# Supplementary material
Source: PubMed Central journal article supplement (PMC8849604)
Supplement: NIHMS1754566-supplement-Supplemental_Publication_Material.pdf [file NIHMS1754566-supplement-Supplemental_Publication_Material.pdf]

**SUPPLEMENTAL MATERIAL**

## Supplemental Figures

### Supplemental Figure 1. Healthy People 2030 Framework

# Social Determinants of Health

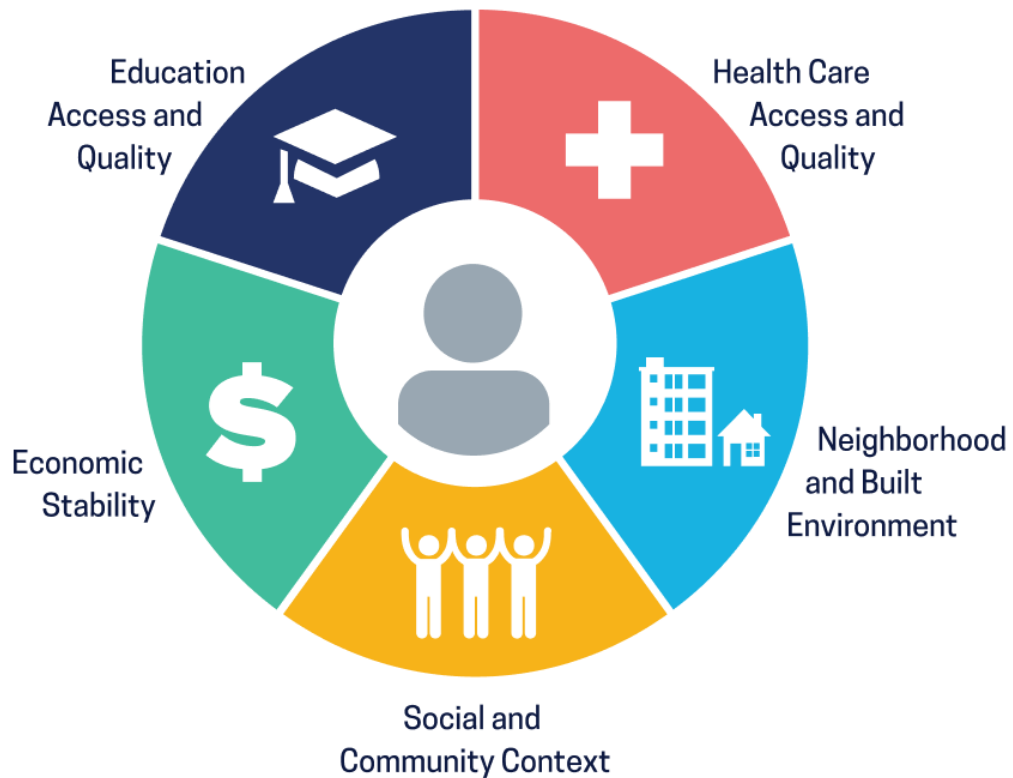

Healthy People 2030, U.S. Department of Health and Human Services, Office of Disease Prevention and Health Promotion. Retrieved June 8, 2021, from <https://health.gov/healthypeople/objectives-and-data/social-determinants-health>

## Supplemental Figure 2. Study Flow Diagram

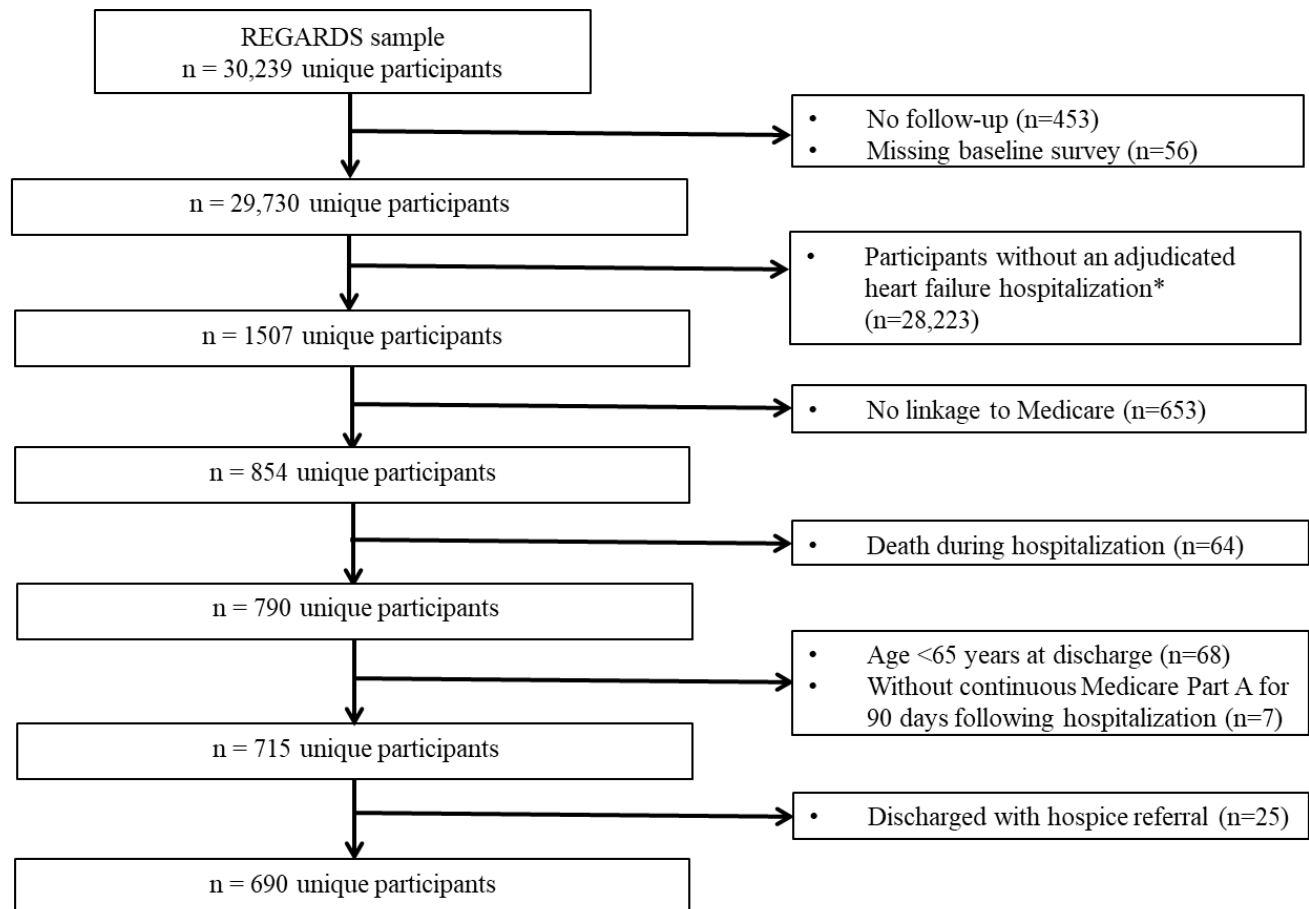

**Abbreviations:** SDOH – Social determinants of health; HF – Heart Failure; REGARDS- Reasons for geographic and racial differences in stroke  
\*First adjudicated heart failure admission in REGARDS- may include participants with evidence of prior HF



## Supplemental Table 1. Results from Competing Risk Analyses

Crude and Fully Adjusted Sub-distribution HRs of 30-Day Readmission Among REGARDS Participants Hospitalized for HF

| SDOH                              | Crude |              |         | Model 1 |              |         | Model 2  |              |         |
|-----------------------------------|-------|--------------|---------|---------|--------------|---------|----------|--------------|---------|
|                                   | SHR   | 95% CI       | P-value | SHR     | 95% CI       | P-value | SHR      | 95% CI       | P-value |
| Education                         | 1.08  | (0.75, 1.56) | 0.68    | 1.08    | (0.72, 1.60) | 0.71    | 1.062994 | (0.71, 1.59) | 0.765   |
| HPSA                              | 1.46  | (1.07, 2.00) | 0.02    | 1.46    | (1.05, 2.02) | 0.03    | 1.341765 | (0.95, 1.9)  | 0.097   |
| Low income                        | 0.95  | (0.68, 1.33) | 0.77    | 0.92    | (0.63, 1.34) | 0.67    | 0.875292 | (0.6, 1.28)  | 0.491   |
| Poor public health infrastructure | 0.9   | (0.65, 1.25) | 0.53    | 0.86    | (0.62, 1.21) | 0.39    | 0.827374 | (0.55, 1.24) | 0.361   |
| Black race                        | 1.16  | (0.84, 1.59) | 0.37    | 1.13    | (0.78, 1.64) | 0.53    | 1.030328 | (0.7, 1.51)  | 0.879   |
| Rural residence                   | 1.23  | (0.76, 2.00) | 0.4     | 1.19    | (0.72, 1.97) | 0.5     | 1.116862 | (0.65, 1.92) | 0.688   |
| Social Isolation-care             | 0.95  | (0.59, 1.53) | 0.82    | 0.9     | (0.55, 1.47) | 0.68    | 0.8321   | (0.5, 1.4)   | 0.487   |
| Social Isolation-friends/family   | 1.31  | (0.85, 2.02) | 0.23    | 1.27    | (0.81, 2.00) | 0.3     | 1.241196 | (0.77, 2)    | 0.374   |
| Zip code level poverty            | 1.08  | (0.74, 1.57) | 0.69    | 0.98    | (0.64, 1.51) | 0.94    | 0.974542 | (0.63, 1.51) | 0.908   |

*Crude – Individual SDOH: Education, HPSA, low income, poor public health infrastructure, black race, rural residence, social network, social isolation, zip code level poverty*

*Model 1- adjusted for other SDOH*

*Model 2 - adjusted for other SDOH, age, Charlson comorbidity index Current smoking, Impaired Cognition, discharge from nursing home, length of stay, and bed size of admitting hospital*
